# Supplementary material
Source: PubMed Central journal article supplement (PMC5935533)
Supplement: NIHMS926647-supplement-Supp_TableS1.pdf [file NIHMS926647-supplement-Supp_TableS1.pdf]

Supplementary Table 1. Mean  $\pm$  s.e.m. number of sequences per sample type.

|             | <b>Foregut</b> | <b>Stomach</b> | <b>Small Int.</b> | <b>Cecum</b>   | <b>Large Int.</b> | <b>Feces</b>   |
|-------------|----------------|----------------|-------------------|----------------|-------------------|----------------|
| <b>PEPO</b> | 1200 $\pm$ 303 | 1111 $\pm$ 219 | 1154 $\pm$ 310    | 1665 $\pm$ 136 | 1934 $\pm$ 226    | 2281 $\pm$ 550 |
| <b>PEMA</b> | 1540 $\pm$ 239 | 1498 $\pm$ 564 | 1756 $\pm$ 513    | 2679 $\pm$ 389 | 2042 $\pm$ 286    | 2594 $\pm$ 183 |
| <b>PELE</b> | 1335 $\pm$ 68  | 1191 $\pm$ 232 | 1358 $\pm$ 289    | 2084 $\pm$ 133 | 2142 $\pm$ 199    | 2475 $\pm$ 212 |
| <b>PEER</b> | 2473 $\pm$ 683 | 1693 $\pm$ 623 | 2238 $\pm$ 699    | 1982 $\pm$ 226 | 2601 $\pm$ 581    | 2943 $\pm$ 217 |
| <b>PECA</b> | 1056 $\pm$ 202 | 1068 $\pm$ 252 | 1285 $\pm$ 331    | 1683 $\pm$ 116 | 1784 $\pm$ 248    | 1695 $\pm$ 92  |
| <b>NELE</b> | 2980 $\pm$ 590 | 498 $\pm$ 203  | 4104 $\pm$ 818    | 5220 $\pm$ 71  | 5395 $\pm$ 239    | 4046 $\pm$ 868 |
| <b>MUMU</b> | 1564 $\pm$ 541 | 2674 $\pm$ 921 | 3786 $\pm$ 1177   | 7685 $\pm$ 948 | 7228 $\pm$ 499    | 8577 $\pm$ 518 |
